# Supplementary material for: Migraine and vascular disease
Source: HighWire-hosted journal article supplement (doi:10.1136/bmj.i2806), 2016-05-31
Supplement: bmj.i2806.pdf [file bmj.i2806.pdf]

# 偏头痛和血管疾病

## 偏头痛的医学启示并不局限于大脑

### Migraine and vascular disease

The medical implications of migraine are not limited to the brain

来源: BMJ 2016;353:i2806 doi: 10.1136/bmj.i2806

在链接的文章 (doi:10.1136/bmj.i2610, 摘要见本期第 244 页) 中, Kruth 和同事们用“护士健康研究 II”的数据来研究偏头痛和心血管事件之间的联系。这是一项大样本队列研究, 对女性护士进行了超过 20 年的随访, 基线期 17 531 名护士被诊断偏头痛。结果显示: 与没有偏头痛的受试者相比, 有偏头痛的受试者发生心肌梗死、心绞痛或进行冠状动脉血管重建的风险更高, 其发生心血管死亡的风险也更高; 发生复合终点事件或卒中的相对风险比没有偏头痛的受试者高约 50%, 且该危险效应不受年龄影响<sup>1</sup>。

该研究中并非所有结果都是新发现。例如, 偏头痛患者的卒中风险升高已经基本确定。卒中风险的增加主要是由于且局限于约 30% 的先兆偏头痛患者, 先兆是指头痛发生前的局灶神经疾病事件。偏头痛患者发生缺血性卒中的风险比没有偏头痛患者增加了约 2 倍, 其发生出血性卒中的风险增加了约 1.5 倍。当偏头痛患者同时伴有其他危险因素如吸烟或使用含有避孕药的雌激素类药物时, 卒中发生的风险更高<sup>2</sup>。

目前对偏头痛与其他血管事件如心肌梗死的相关性了解很少, 且现有的研究结论不一致<sup>3</sup>。该研究结果强化了这一观点, 即除了影响大脑功能以外, 偏头痛也是血管疾病的一个危险因素。心血管事件风险的增加并不完全与疾病的活动性有关, 因为随着年龄的增加, 心血管事件的风险会升高, 而头痛的症状通常会好转或消失。该研究没有采集先兆的信息, 因此无法回答一个重要的问题, 即血管事件风险的增

加是否局限于先兆偏头痛这一亚组。此外, 在该研究中, 所有的受试者均为女性, 因此无法确认对于有偏头痛的男性, 其心血管事件发生的风险是否增加。然而, 这两个因素都有可能影响结果。

脑部疾病如何能影响心脏呢? 有证据表明, 血管内皮功能障碍或血管反应性异常为基础的病理生理机制, 可能使先兆性神经系统事件和血管疾病发生的倾向性增加。通常偏头痛患者的内皮祖细胞相对减少, 而先兆偏头痛患者中内皮炎症标记物水平升高<sup>4</sup>。目前仍然不清楚疾病的亚型特征如疾病的持续时间或先兆发生的频率是否会影响偏头痛与血管疾病之间的相关关系, 并且对常用的治疗偏头痛的药物如  $\beta$ -肾上腺素能受体阻滞剂是否会改变这种关系也不确定。

该研究有几点提示。首先, 是时候将偏头痛列为增加晚年心血管病风险的早发疾病了<sup>5</sup>。然而, 该风险不可过分强调。就单个患者来讲, 该风险是相对较小的, 但由于偏头痛的患病率很高, 因此从人群的角度来讲, 这种风险仍然很重要。此外, 至少在美国, 偏头痛在某些少数民族和经济水平较低的人群中患病率较高, 这些人群同时伴有较多的心血管病危险因素<sup>6,7</sup>。

其次, 重要的一点是了解引起偏头痛的血管危险因素与其他危险因素的相互作用, 尤其是遇到常用的药物会引起或可能引起不良的血管结局时。更值得担心的是, 是否两个危险因素的综合效应会造成加倍的而不是相加的风险。目前正在进行偏头痛预防的 III 期临床试验, 抗体的

Rebecca C Burch  
instructor in  
neurology<sup>1</sup>,  
Melissa L Rayhill  
assistant professor of  
neurology<sup>2</sup>

<sup>1</sup>Harvard Medical  
School, Boston, MA,  
USA;  
<sup>2</sup>Jacobs School of  
Medicine and  
Biomedical Sciences,  
The State University  
of New York at  
Buffalo, NY, USA

Correspondence to:  
R Burch, John R  
Graham Headache  
Center, 1153 Centre  
Street Suite 4970,  
Jamaica Plain, MA  
02130, USA  
rburch@partners.org

苏宁译  
倪俊校  
北京协和医院  
神经科

靶点是降钙素基因相关肽(CGRP)或其受体,以及该药物批准上市后开展的安全性监测。在这两个过程当中,都应该牢记上述问题<sup>8</sup>。CGRP是一种有效的全身血管扩张药物,基于动物实验的结果,有专家提出长期阻断CGRP可能会增加血管事件发生的风险<sup>9</sup>。这一点特别重要,因为偏头痛是一种长期慢性病,许多患者接受预防性偏头痛治疗长达数十年。

最后,该研究提出了很多关于治疗方面的问题。偏头痛的治疗在减少先兆发生的频率、减轻先兆和头痛严重程度的同时,是否会减少晚年发生血管事件的风险?偏头痛患者是否应该同时使用他汀类药物或阿司匹林?虽然直觉上这些干预可以使偏头痛患者获益,但是在假设这些药物的使用会使患者受益时仍需谨慎。例如,“妇女健康研究”的一项探索性亚组分析显示,患有先兆偏头痛的女性服用阿司匹林后,其发生心肌梗死的风险更高。因此,现有的有限证据提示,治疗方面的限制很必要,除非我们能够更好地理解偏头痛与血管疾病之间联系的机制。

目前,不应该将偏头痛做为心血管危险因素进行医疗干预(除了目前推荐的进行心脏方面的评估和提倡健康的生活方式),尤其当偏头痛是患者唯一的危险因素时。正如Will Durant观察到的,“历史的教训之一是,什么事情都不做往往是做了一件好事”。

利益竞争(Competing interests): We have read and understood the BMJ policy on declaration of interests and declare the following interests: RCB worked with Tobias Kurth in an editorial capacity at

The BMJ in the past.

来源及同行评议(Provenance and peer review): Commissioned; not peer reviewed.

#### 参考文献

- 1 Kurth T, Winter AC, Eliassen AH, et al. Migraine and risk of cardiovascular disease in women: prospective cohort study. *BMJ* 2016;353:i2610.
- 2 Sacco S, Kurth T. Migraine and the risk for stroke and cardiovascular disease. *Curr Cardiol Rep* 2014;16:524. doi:10.1007/s11886-014-0524-1 pmid:25059466.
- 3 Kurth T, Gaziano JM, Cook NR, Logroscino G, Diener HC, Buring JE. Migraine and risk of cardiovascular disease in women. *JAMA* 2006;296:283-91. doi:10.1001/jama.296.3.283 pmid:16849661.
- 4 Butt JH, Franzmann U, Kruuse C. Endothelial function in migraine with aura-a systematic review. *Headache* 2015;55:35-54. doi:10.1111/head.12494 pmid:25546573.
- 5 Fraser A, Nelson SM, Macdonald-Wallis C, et al. Associations of pregnancy complications with calculated cardiovascular disease risk and cardiovascular risk factors in middle age: the Avon Longitudinal Study of Parents and Children. *Circulation* 2012;125:1367-80. doi:10.1161/CIRCULATIONAHA.111.044784 pmid:22344039.
- 6 Burch RC, Loder S, Loder E, Smitherman TA. The prevalence and burden of migraine and severe headache in the United States: updated statistics from government health surveillance studies. *Headache* 2015;55:21-34. doi:10.1111/head.12482 pmid:25600719.
- 7 Loder S, Sheikh HU, Loder E. The prevalence, burden, and treatment of severe, frequent, and migraine headaches in US minority populations: statistics from National Survey studies. *Headache* 2015;55:214-28. doi:10.1111/head.12506 pmid:25644596.
- 8 Edvinsson L. CGRP receptor antagonists and antibodies against CGRP and its receptor in migraine treatment. *Br J Clin Pharmacol* 2015;80:193-9. doi:10.1111/bcp.12618 pmid:25731075.
- 9 Peroutka SJ. Calcitonin gene-related peptide targeted immunotherapy for migraine: progress and challenges in treating headache. *Bio Drugs* 2014;28:237-44. doi:10.1007/s40259-014-0083-4 pmid:24452707.

BMJ takes no responsibility for the accuracy of the translation from the published English language original and is not liable for any errors that may occur.

# BMJ
